# Supplementary material for: 7-Mercapto-4-methylcoumarin as a reporter of thiol binding to the CdSe quantum dot surface
Source: Royal Society of Chemistry journal article supplement (doi:10.1039/b900606k), 2009-01-01
Supplement: b900606k.pdf [file b900606k.pdf]

## Supporting information for

### 7-Mercapto-4-methylcoumarin as a reporter of thiol binding to the CdSe quantum dots surface

María González-Béjar, Mathieu Frenette, Larissa Jorge and J. C. Scaiano

Pages S2-S3: Experimental details and synthesis of core CdSe QD558 and (Cm-S)<sub>2</sub>.

Pages S4-S5: Figure S1: <sup>1</sup>H-RMN of a) Cm-SH, b) core-shell QD485 c) TOPO and Cm-SH d) a mixture of QD485 and Cm-SH in CDCl<sub>3</sub>.

Page S6: Figure S2: UV-Visible spectra of core-shell QD485 (2.54 μM), (Cm-S)<sub>2</sub> (2.9 μM) and the mixture of both in toluene.

Page S6: Figure S3: UV-Visible spectra at ratios [Cm-SH]/[QD] up to 30 in toluene.

Page S7: Figure S4: Changes in (Cm-S)<sub>n</sub>-QD485 fluorescence intensity as a function of sample aging.

Page S7: Figure S5: Excitation and emission spectra of the (Cm-S)<sub>n</sub>-QD485 supramolecular structures.

Page S8: Figure S6: UV-Visible spectra of Cm-SH in basic or acid methanol.

Page S8: Figure S7: Fluorescence spectra of core-shell (A) QD485 or (B) QD550 upon incremental addition of Cm-SH (up to 15 μM) in toluene ( $\lambda_{exc}$  = 420 nm).

Page S8: Table S1. QD and (Cm-S)<sub>n</sub>-QD lifetimes in ns.

Page S9: Figure S8: Fluorescence decay traces of core-shell QD550 upon additions of Cm-SH up to 15 μM in deaerated toluene. A)  $\lambda_{exc}$  = 440 nm,  $\lambda_{em}$  > 550 nm and B)  $\lambda_{exc}$  = 395 nm,  $\lambda_{em}$  < 500 nm.

Page S9: Figure S9: UV-Visible and emission spectra of the synthesized core CdSe QD558.

Page S10: Figure S10: UV-Visible of core CdSe QD558 in absence and in presence of increasing amounts of Cm-SH.

Page S10: Figure S11: Emission spectra of core CdSe QD558 in absence and in presence of increasing amounts of Cm-SH at two different excitation wavelengths (373 or 450 nm).

Page S11: Figure S12: Stern-Volmer plots for the quenching of core-shell QD485 and core CdSe QD558 by Cm-SH.

Page S12: Figure S13: Fluorescence decay traces of core CdSe QD558 upon additions of Cm-SH up to 15 μM in deaerated toluene. A)  $\lambda_{exc}$  = 440 nm,  $\lambda_{em}$  > 550 nm and B)  $\lambda_{exc}$  = 395 nm,  $\lambda_{em}$  < 500 nm.

### ***Experimental Details:***

Cm-SH was purchased from Fluka and recrystallized prior to use. CdSe/ZnS QD were purchased from Evident Technologies and the experiments were carried out in toluene solution at room temperature without QD purification (i.e., we did not eliminate any excess of TOPO free in solution) since our objective was not quantify the amount of TOPO that can be released upon capping exchange with Cm-SH. All the fluorescence measurements were recorded under nitrogen (we have noticed that the emission of the new assembly, (Cm-S)<sub>n</sub>-QD, is air sensitive) with a Photon Technology International (PTI) spectrofluorometer. Fluorescence lifetime measurements were recorded using an EasyLife LS (PTI) using the appropriate pulsed LED diodes and filters for each case.

<sup>1</sup>H NMR spectra were obtained on a Bruker Avance-300 spectrometer at 300 MHz using CDCl<sub>3</sub> as solvent with tetramethylsilane as an internal standard.

### ***Details of UV-Visible or steady state fluorescence quenching experiments:***

In a typical experiment, 2 mL of a toluene solution of QD 2.54 μM or 0.51 μM (for UV-Visible or fluorescence, respectively) was prepared in a precision quartz cuvette. For fluorescence studies the sample was deaerated at least 20 min with N<sub>2</sub>.

Added to the cuvette were varying amounts of a 0.19 mM Cm-SH stock solution in toluene such that the total volume added to each cuvette was 200 μL or less.

### ***Synthesis of core CdSe QD558:***

It is well-known that the ZnS shell protects QD from quenching.<sup>1</sup> In order to learn more about the shell effect in our system, we have synthesized core CdSe QD protected by a layer of trioctylphosphine oxide (TOPO) ligands with emission at 558 nm using the procedure reported by Peng and Peng.<sup>2</sup> Briefly, Se (56.6 mg) was dissolved in trioctylphosphine (2.5 mL) to make a TOPSe solution. Cadmium oxide (53.0 mg), tetradecylphosphonic acid (223.7 mg), and TOPO (3.78 g) were heated to 300°C under a N<sub>2</sub> flow in a 25mL three-necked round bottom flask equipped with a stir bar and until the solution turned clear and colorless.

This mixture was allowed to cool to 270°C, and the TOPSe solution was injected into the reaction flask under strong stirring. The reaction was stopped 2h 30 min after the injection by transferring the reaction mixture from the flask into ice-cold methanol. After washing with methanol and centrifugation at 4000 rpm during 20 min (3x), the QD were redispersed in

toluene and kept in the dark.

We have observed these new assemblies (Cm-S)<sub>n</sub>-QD by UV-Vis and steady-state fluorescence by using the same procedure as above. However, upon excitation at 373 nm, as the new band appears, the QD fluorescence was being quenched (in contrast with the core-shell QD550), which confirms that the ZnS shell is protecting the QD from quenching (See ESI7-10).

### ***Synthesis of (Cm-S)<sub>2</sub>***<sup>2</sup>

Using a mortar and pestle, 7-mercapto-4-methylcoumarin (151.3 mg, 0.7871 mmol), KMnO<sub>4</sub> (127.0 mg, 0.8036 mmol) and neutral Al<sub>2</sub>O<sub>3</sub> (88.8 mg, 0.871 mmol) were grinded together for 10 min. The product was extracted using a generous amount of dichloromethane and the resulting mother liquor was evaporated to dryness using a rotatory evaporator. The residual solid was recrystallized from ethanol and dichloromethane to afford 41.4 mg (28% yield) of pale yellow needles. <sup>1</sup>H NMR (CDCl<sub>3</sub>, 400 MHz): δ 7.51 (*J*=8.2 Hz, d, 1H, *ArH*), 7.41 (*J*=2 Hz, d, 1H, *ArH*), 7.37 (*J*<sub>1</sub>=8.2 Hz, *J*<sub>2</sub>=1.8 Hz, q, 1H, *ArH*), 6.23 (*J*=0.8 Hz, d, 1H, =CH), 2.39 (*J*=0.8 Hz, d, 3H, CH<sub>3</sub>). <sup>13</sup>C NMR (CDCl<sub>3</sub>, 400 MHz): δ 160.14, 153.97, 151.80, 140.81, 125.25, 122.08, 119.05, 114.93, 114.36, 18.63. m.p. 234-245°C. MS (EI) *m/z* 382.03 (24.4), 318.10 (20.1), 290.05 (32.8), 191.01 (55.5), 163.02 (49.9), 91.1 (100.0), 77.04 (50.9), 68.98 (65.6). HRMS Calcd. for C<sub>20</sub>H<sub>14</sub>O<sub>4</sub>S<sub>2</sub>: 382.0334. Found: 382.0314.

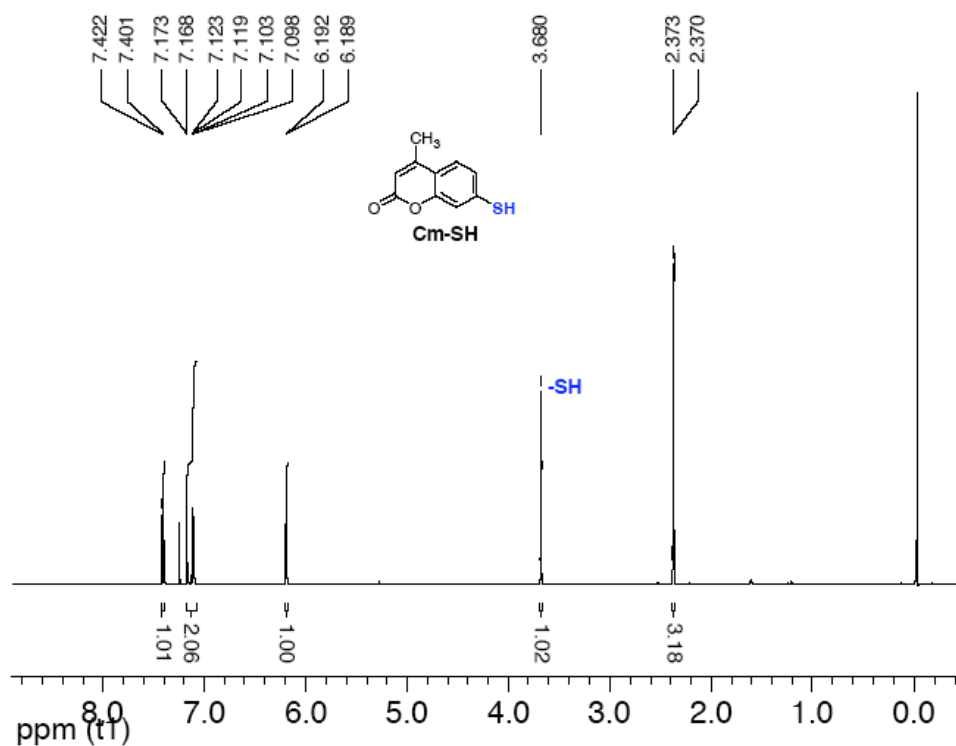

**Fig. S1. a)**  $^1\text{H}$ -RMN of Cm-SH in  $\text{CDCl}_3$ .

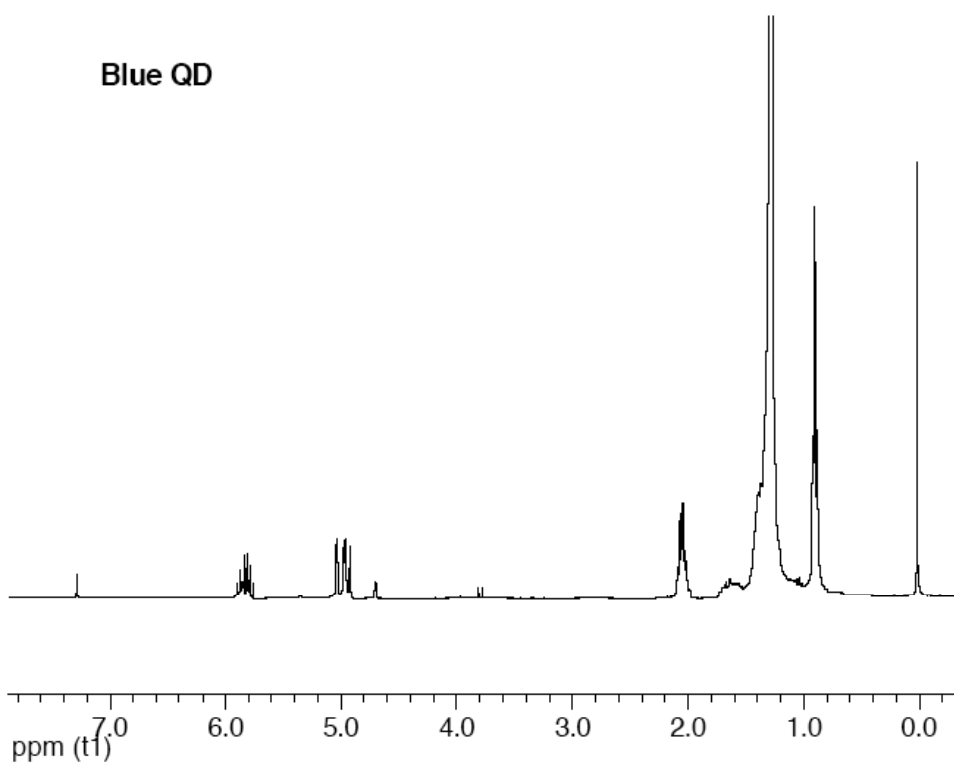

**Fig. S1. b)**  $^1\text{H}$ -RMN of core-shell QD485 in  $\text{CDCl}_3$ .

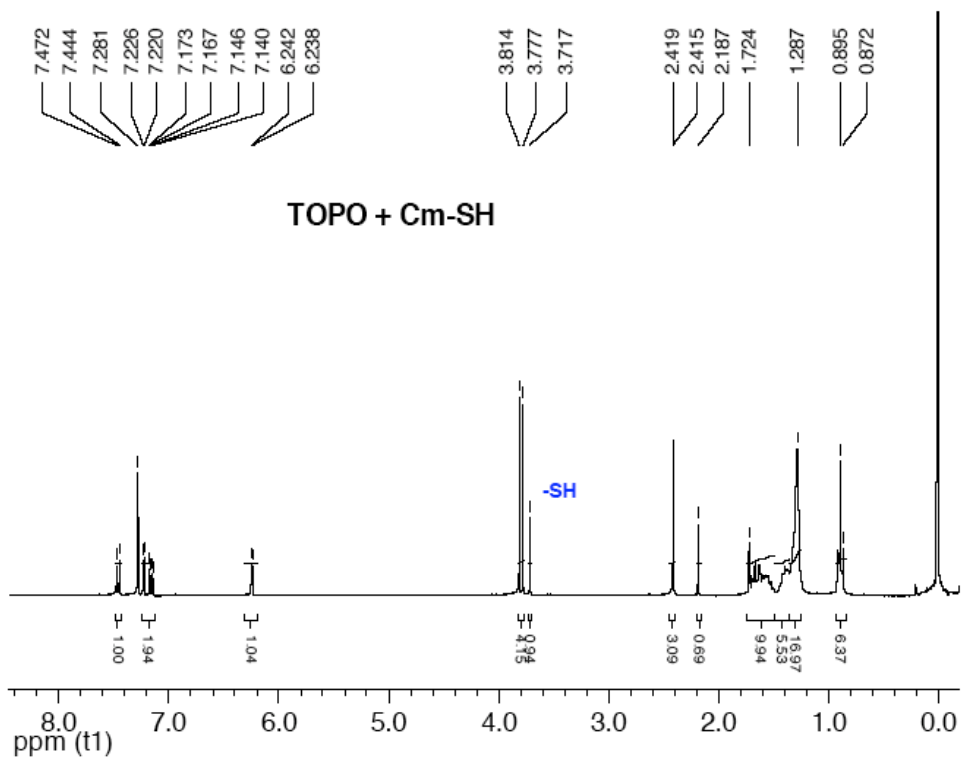

**Fig. S1. c)**  $^1\text{H}$ -RMN of TOPO and Cm-SH in  $\text{CDCl}_3$ .

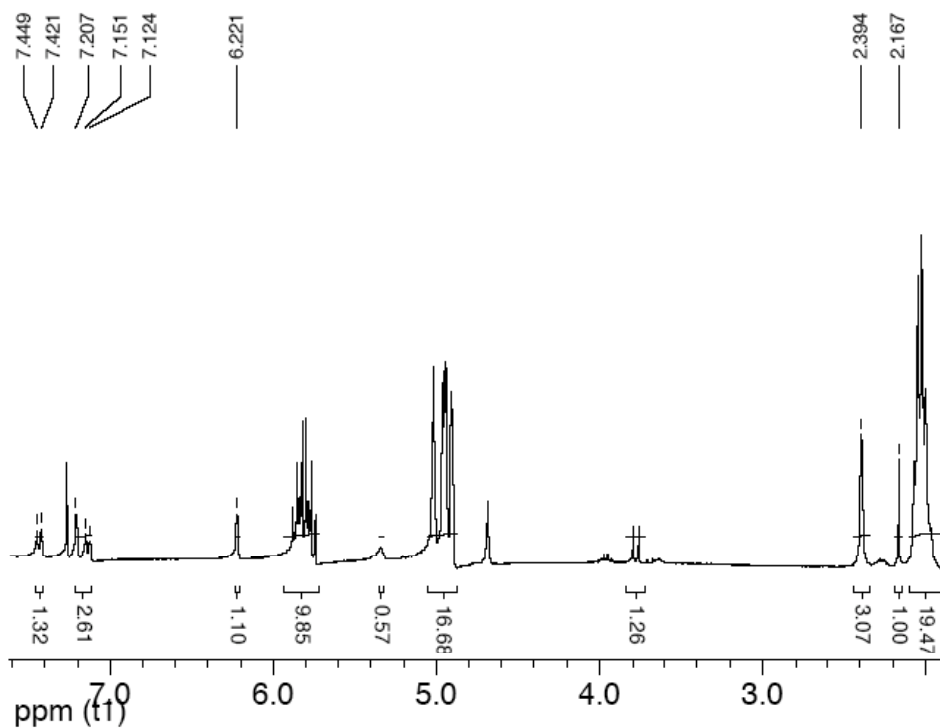

**Fig. S1. d)**  $^1\text{H}$ -RMN of a mixture of core-shell QD485 and Cm-SH in  $\text{CDCl}_3$ .

**Effect of (Cm-S)<sub>2</sub> on QD485 absorbance:**

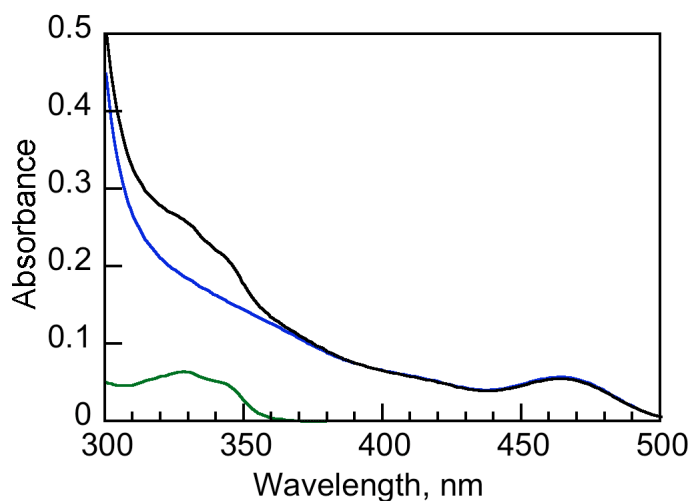

**Fig. S2.** UV-Visible spectra of core-shell QD485 (blue line, 2.54 μM), (Cm-S)<sub>2</sub> (green line, 2.9 μM) and the mixture of both in toluene (black line).

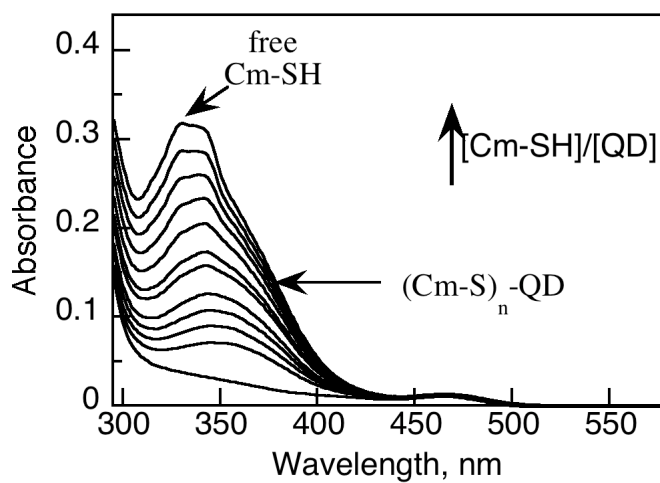

**Fig. S3:** UV-Visible spectra of 0.51 μM QD485 with incremental addition of Cm-SH up to 15 μM in toluene (ratio [Cm-SH]/[QD485] up to 30).

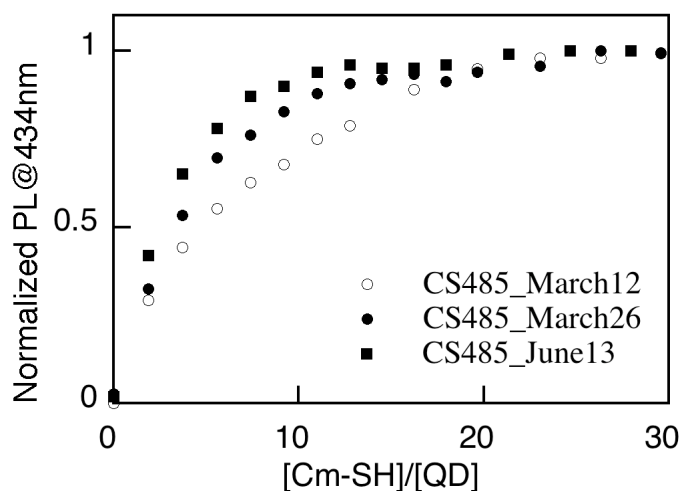

**Fig. S4:** Changes in (Cm-S)<sub>n</sub>-QD485 fluorescence intensity as a function of sample aging ( $\lambda_{\text{exc}} = 373$ ,  $\lambda_{\text{mon}} = 434$ ).

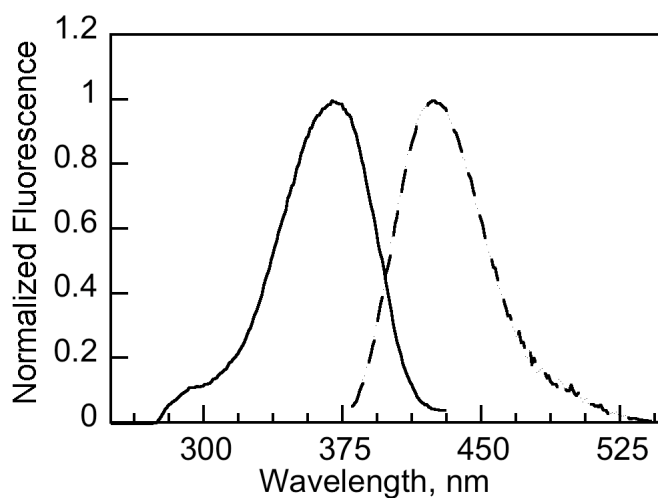

**Fig. S5.** Normalized excitation ( $\lambda_{\text{exc}} = 240\text{-}430$  nm,  $\lambda_{\text{em}} = 440$  nm, solid line) and b) emission ( $\lambda_{\text{exc}} = 373$  nm, dashed line) spectra of the (Cm-S)<sub>n</sub>-QD485 supramolecular structures. The emission spectrum shown is the difference between QD485 with and without Cm-SH.

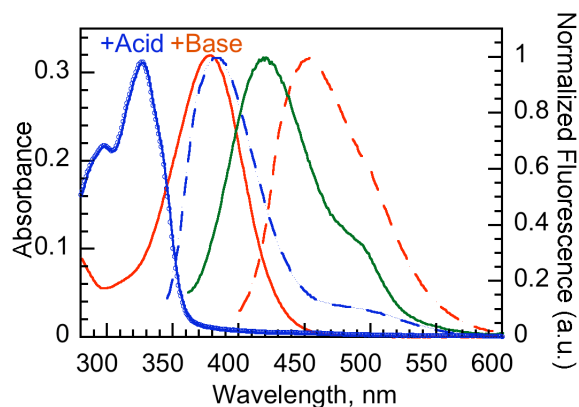

**Fig. S6.** UV-Visible spectra of Cm-SH under acidic (0.5M H<sub>2</sub>SO<sub>4</sub>, blue, labelled “+Acid”) or basic (0.22 triethylamine, orange, labelled “+Base”) conditions in methanol. The blue dashed line ( $\lambda_{\text{exc}}=330$  nm) corresponds to Cm-SH emission under acid conditions, the orange dashed line ( $\lambda_{\text{exc}}=380$  nm) and green solid line ( $\lambda_{\text{exc}}=308$  nm) to Cm-SH emission under basic conditions. Fluorescence spectra are normalized on the right axis. Under basic conditions the species present in solution is the anionic form.<sup>3</sup>

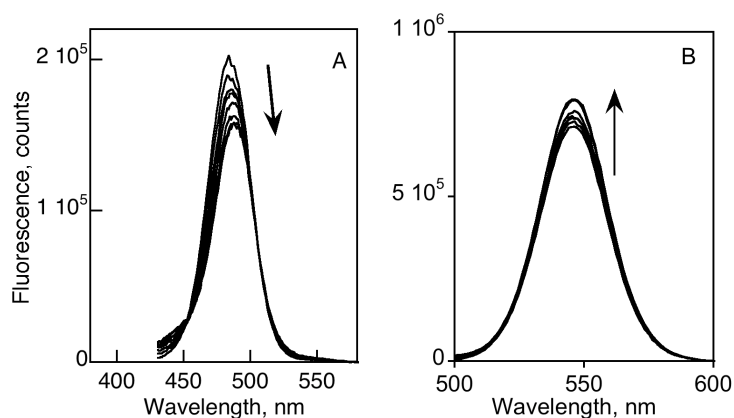

**Fig. S7:** Fluorescence spectra of core-shell (A) QD485 or (B) QD550 (both 0.51  $\mu\text{M}$ , under N<sub>2</sub>) upon incremental addition of Cm-SH (up to 15  $\mu\text{M}$ ) using  $\lambda_{\text{exc}}=420$  nm in toluene.

**Table S1.** QD and (Cm-S)<sub>n</sub>-QD lifetimes in ns (A are the relative weights).

|                  | $\tau_1$ (A <sub>1</sub> %) | $\tau_2$ (A <sub>2</sub> %) | $\tau_3$ (A <sub>3</sub> %) | (Cm-S) <sub>n</sub> -QD |
|------------------|-----------------------------|-----------------------------|-----------------------------|-------------------------|
| Core QD485       | 2.9 (34)                    | 7.4 (41)                    | 16.4 (25)                   | 2.2                     |
| Core-shell QD550 | 1.7 (36)                    | 10.4 (54)                   | 31.0 (10)                   | 1.5                     |
| Core-shell QD558 | 11.6 (54)                   | 40.7 (35)                   | 124.2 (11)                  | 2.2                     |

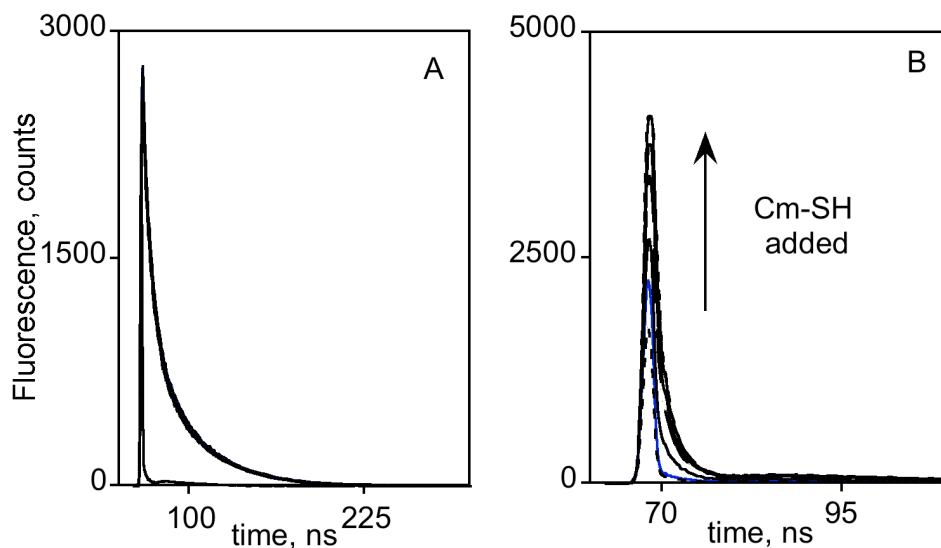

**Fig. S8:** Fluorescence decay traces of core-shell QD550 (0.51  $\mu\text{M}$ ) upon incremental addition of Cm-SH up to 15  $\mu\text{M}$  in deaerated toluene. A)  $\lambda_{\text{exc}} = 440 \text{ nm}$ ,  $\lambda_{\text{em}} > 550 \text{ nm}$  and B)  $\lambda_{\text{exc}} = 395 \text{ nm}$ ,  $\lambda_{\text{em}} < 500 \text{ nm}$ . The IRF signal has been added in both graphs for comparison (shorter decay for panel A, dashed line for panel B).

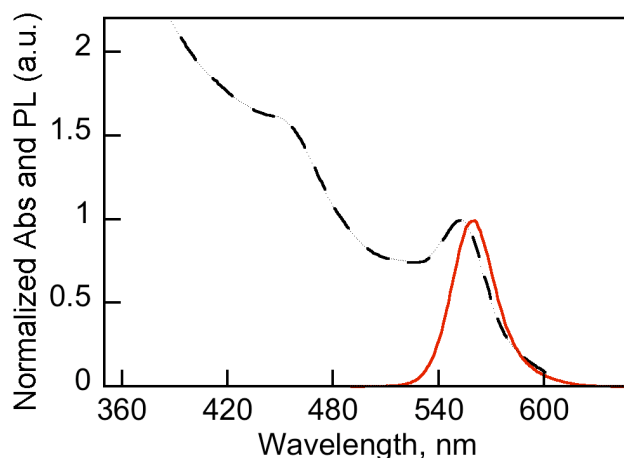

**Fig. S9:** Normalized UV-Visible (black dashed line) and emission (orange solid line) spectra of core CdSe QD558 (no ZnS shell) in toluene.

Peng et al.<sup>4</sup> found the relationship between the first exciton peak and the nanoparticle size. By using this equation the size and extinction coefficient per mole of our CdSe QD were calculated (552 nm absorption peak) and found to be 3.1 nm and  $1.1 \times 10^5 \text{ M}^{-1} \text{ cm}^{-1}$ , respectively.

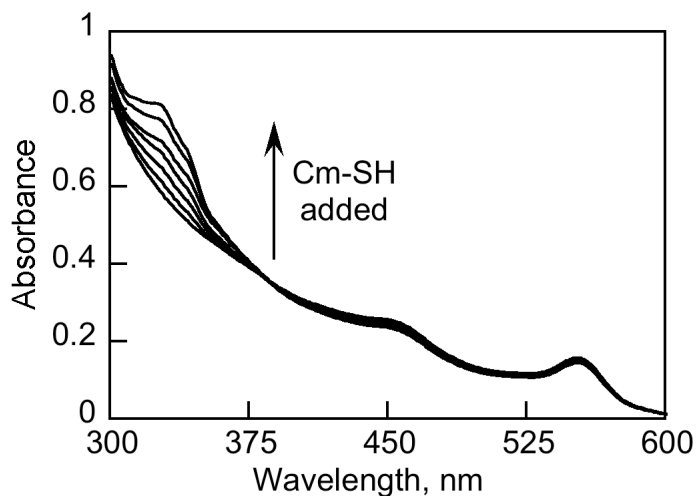

**Fig. S10:** UV-Visible of core CdSe QD558 (2.54  $\mu\text{M}$ ) upon addition of Cm-SH up to 18.5  $\mu\text{M}$  in toluene.

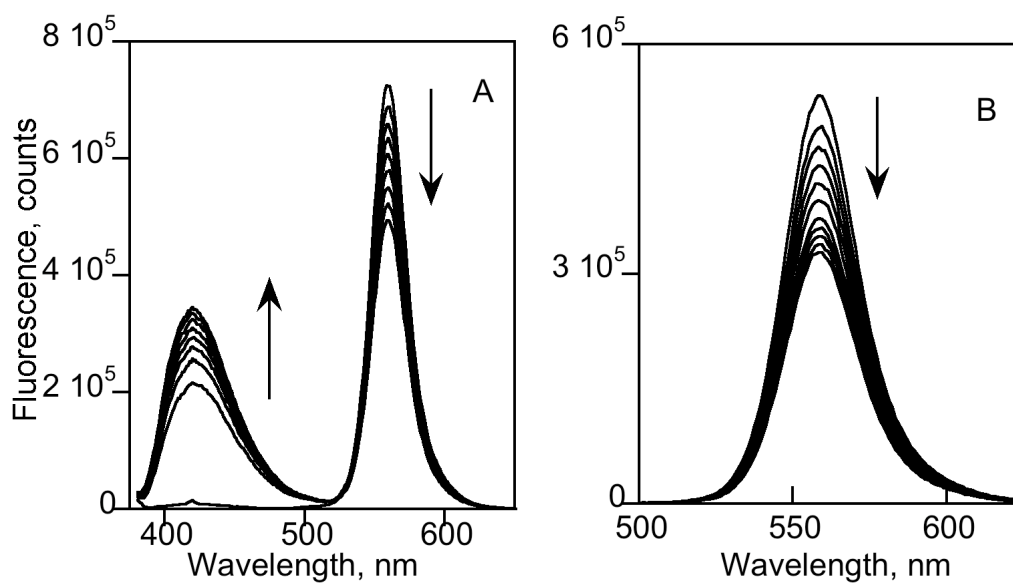

**Fig. S11:** Emission spectra of core CdSe QD558 (0.51  $\mu\text{M}$ ) upon increasing additions of Cm-SH up to 20  $\mu\text{M}$  in deaerated toluene at two different excitation wavelengths A) 373 nm and B) 450 nm.

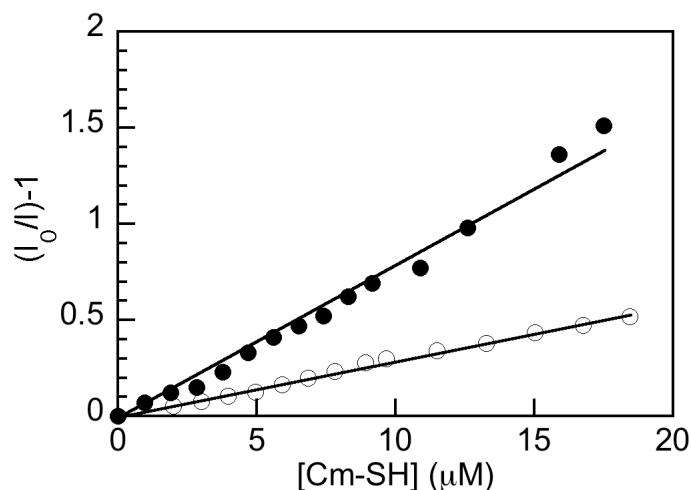

**Fig. S12:** Stern-Volmer plots for the quenching of core-shell QD485 (black solid circles,  $\lambda_{\text{exc}}=465$  nm,  $\lambda_{\text{em}}=480$  nm) and core CdSe QD558 (black circles outlines,  $\lambda_{\text{exc}}=450$  nm,  $\lambda_{\text{em}}=558$  nm) by Cm-SH.

In order to obtain the quantitative characteristics of the fluorescence quenching process, Stern-Volmer experiments were carried out. When aliquots of the Cm-SH solutions are added to the QD solution, the decrease in the emission intensity is described by eq. 1,

$$I_0/I - 1 = K_{\text{SV}}[Q] \quad (1)$$

where  $K_{\text{SV}}$  is the Stern-Volmer constant. Thus, we obtained the following values:

$$K_{\text{SV}} = 7.9 \times 10^4 \text{ M}^{-1} \text{ (Stern-Volmer constant for core-shell QD485 quenching by Cm-SH).}$$

$$K_{\text{SV}} = 2.9 \times 10^4 \text{ M}^{-1} \text{ (Stern-Volmer constant for core CdSe QD558 quenching by Cm-SH).}$$

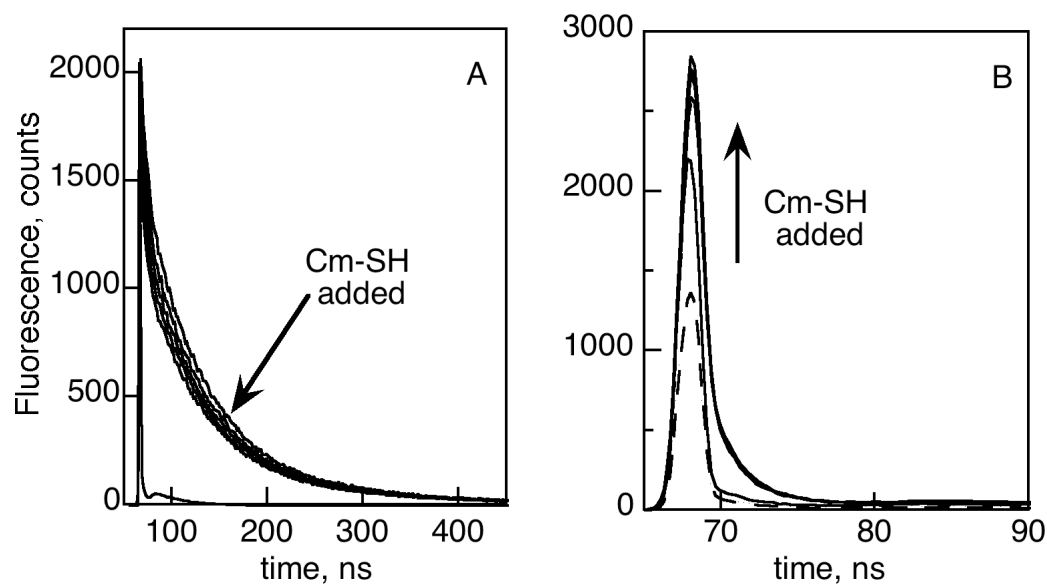

**Fig. S13:** Fluorescence decay traces of core CdSe QD558 (0.51  $\mu\text{M}$ ) upon incremental addition of Cm-SH up to 15  $\mu\text{M}$  in deaerated toluene. A)  $\lambda_{\text{exc}} = 440 \text{ nm}$ ,  $\lambda_{\text{em}} > 550 \text{ nm}$  and B)  $\lambda_{\text{exc}} = 395 \text{ nm}$ ,  $\lambda_{\text{em}} < 500 \text{ nm}$ . The IRF signal has been added in both graphs for comparison (shorter decay for panel A, dashed line for panel B).

#### References:

1. E. Heafey, M. Laferrière and J. C. Scaiano, *Photochem. Photobiol. Sci.*, 2007, 6, 580-584.
2. Z. A. Peng and X. Peng, *J. Am. Chem. Soc.* 2001, 123, 183-184.
3. M. Frenette, PhD diss., University of Ottawa, 2008.
4. W. W. Yu, L. Qu, W. Guo and X. Peng, *Chem. Mater.*, 2003, 15, 2854.
